# Supplementary material for: One-step preparation of fluorescent inorganic–organic hybrid material used for explosive sensing
Source: Royal Society of Chemistry journal article supplement (doi:10.1039/c1py00012h), 2011-01-01
Supplement: c1py00012h.pdf [file c1py00012h.pdf]

**ESI**

**One-step preparation of fluorescent inorganic–organic hybrid material used for explosive sensing**

Xin-Ming Hu,<sup>a,b</sup> Qi Chen,<sup>a</sup> Ding Zhou,<sup>a</sup> Jie Cao,<sup>\*c</sup> Yu-Jian He<sup>\*b</sup> and Bao-Hang Han<sup>\*a</sup>

<sup>a</sup> National Center for Nanoscience and Technology, Beijing 100190, China. Fax: +86-10-82545576; e-mail: [hanbh@nanoctr.cn](mailto:hanbh@nanoctr.cn)

<sup>b</sup> College of Chemistry and Chemical Engineering, Graduate University of Chinese Academy of Sciences, Beijing 100049, China. Email: [heyujian@gucas.ac.cn](mailto:heyujian@gucas.ac.cn)

<sup>c</sup> Department of Chemistry, Beijing Institute of Technology, Beijing 100081, China. Email: [jcao@bit.edu.cn](mailto:jcao@bit.edu.cn)

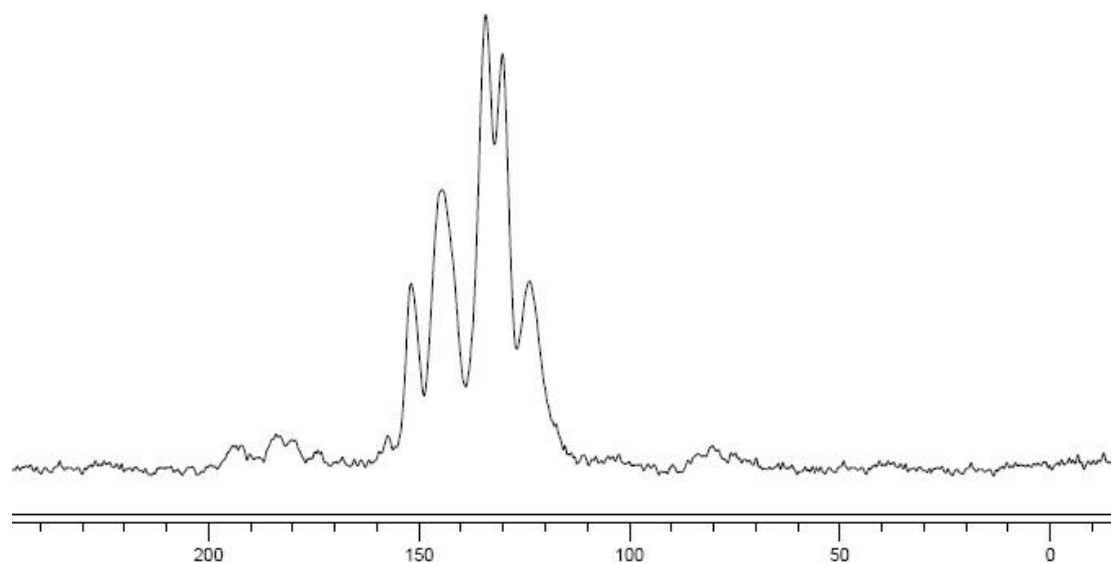

**Fig. S1** MAS <sup>13</sup>C NMR spectrum of TPE-CP.

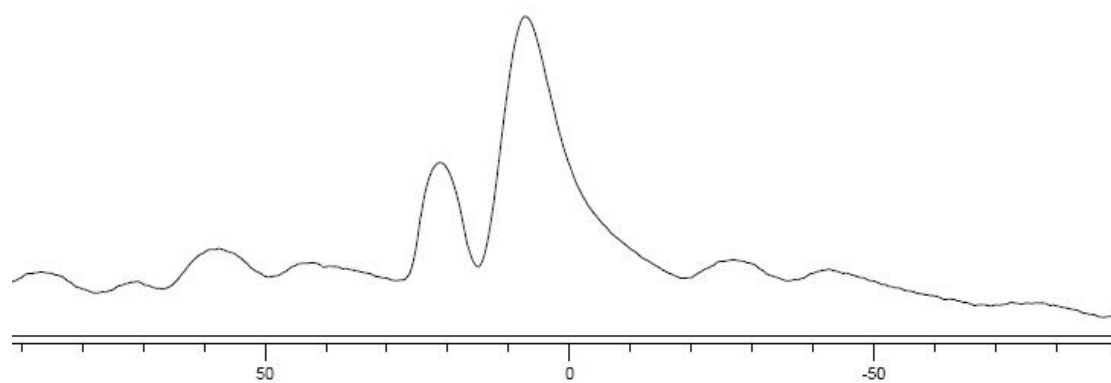

Fig. S2 MAS  $^{31}\text{P}$  NMR spectrum of TPE-CP.

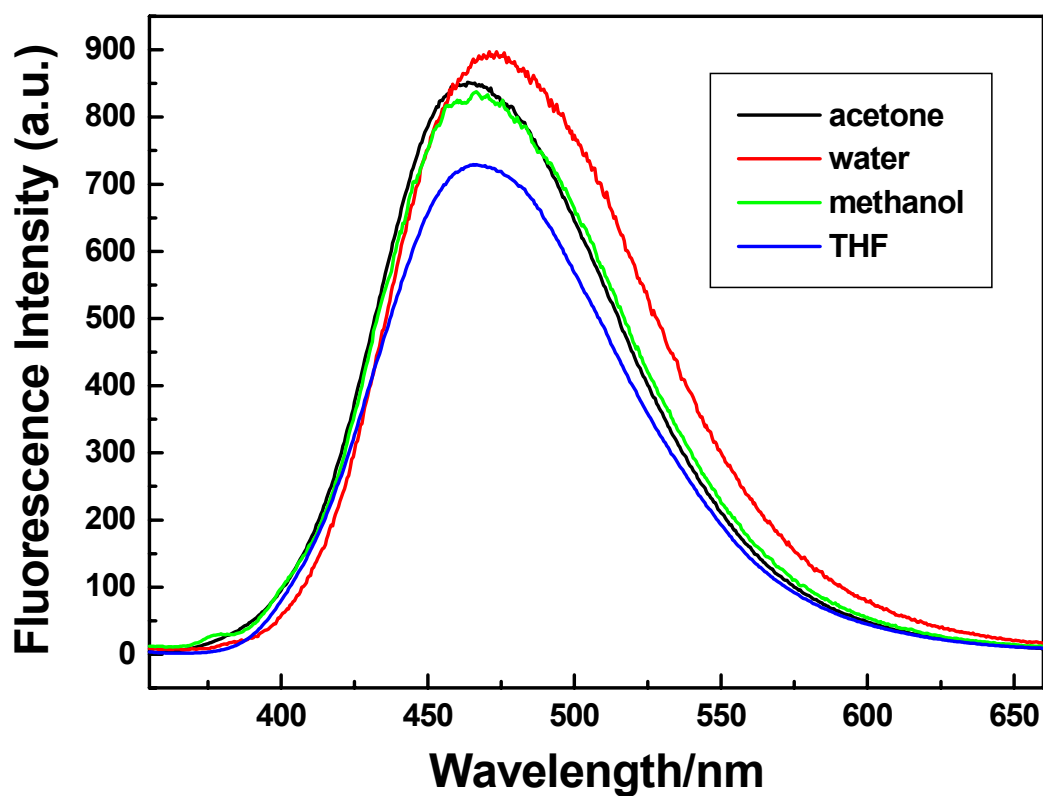

Fig. S3 Fluorescence spectra of TPE-CP suspension in different solvents.

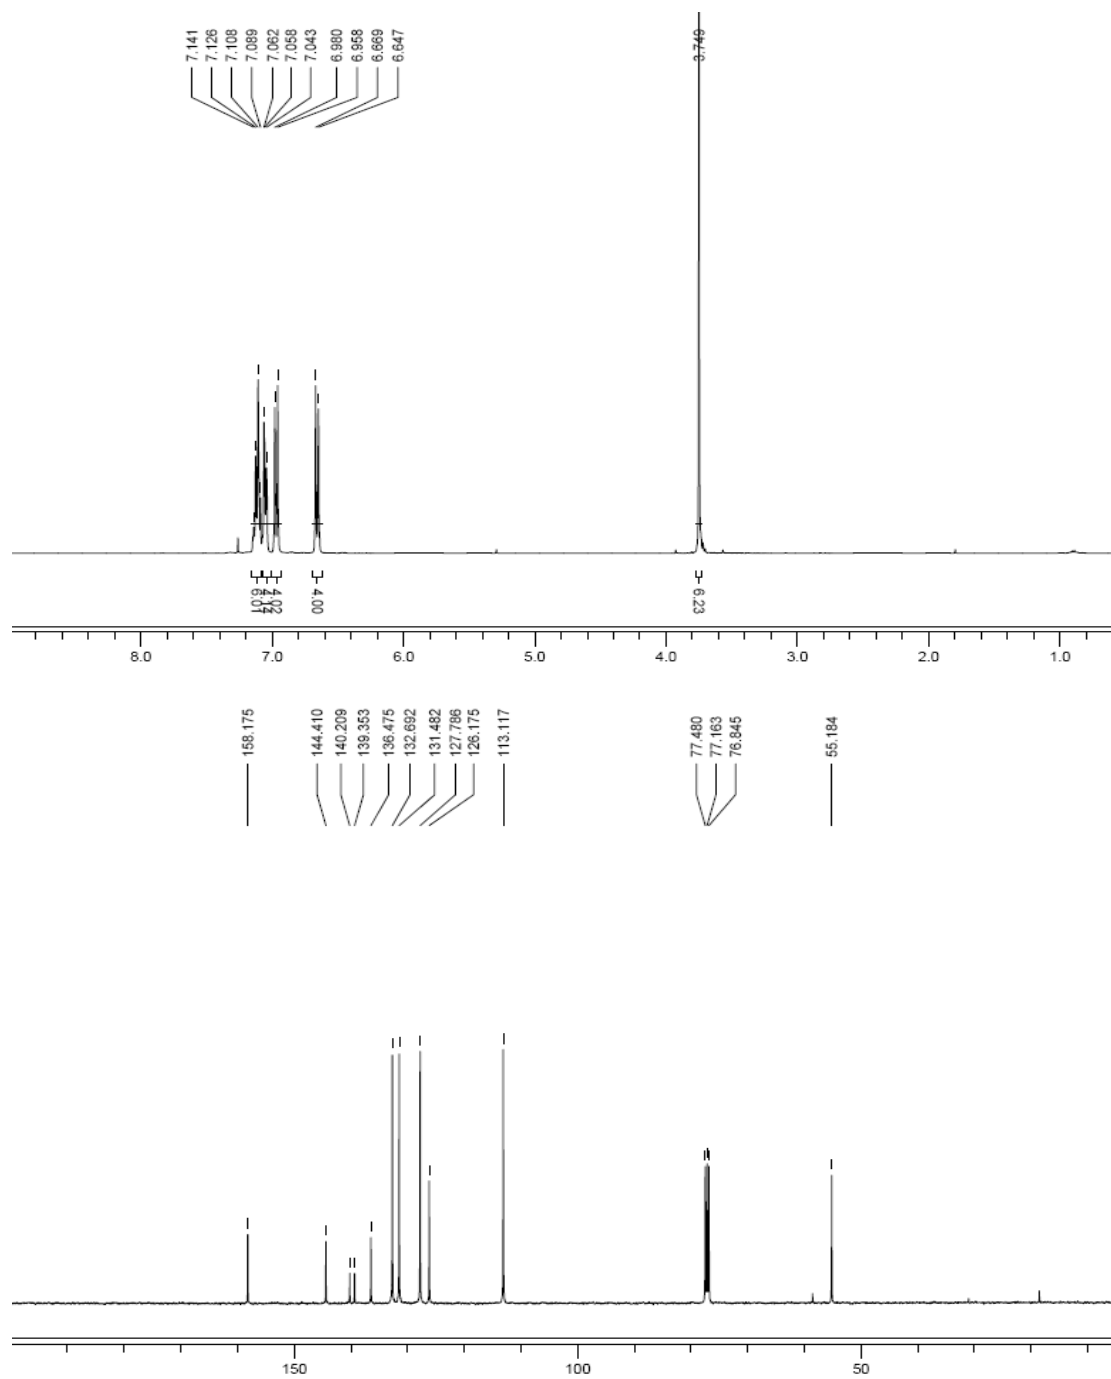

**Fig. S4**  $^1\text{H}$  and  $^{13}\text{C}$  NMR spectra of DMTPE.

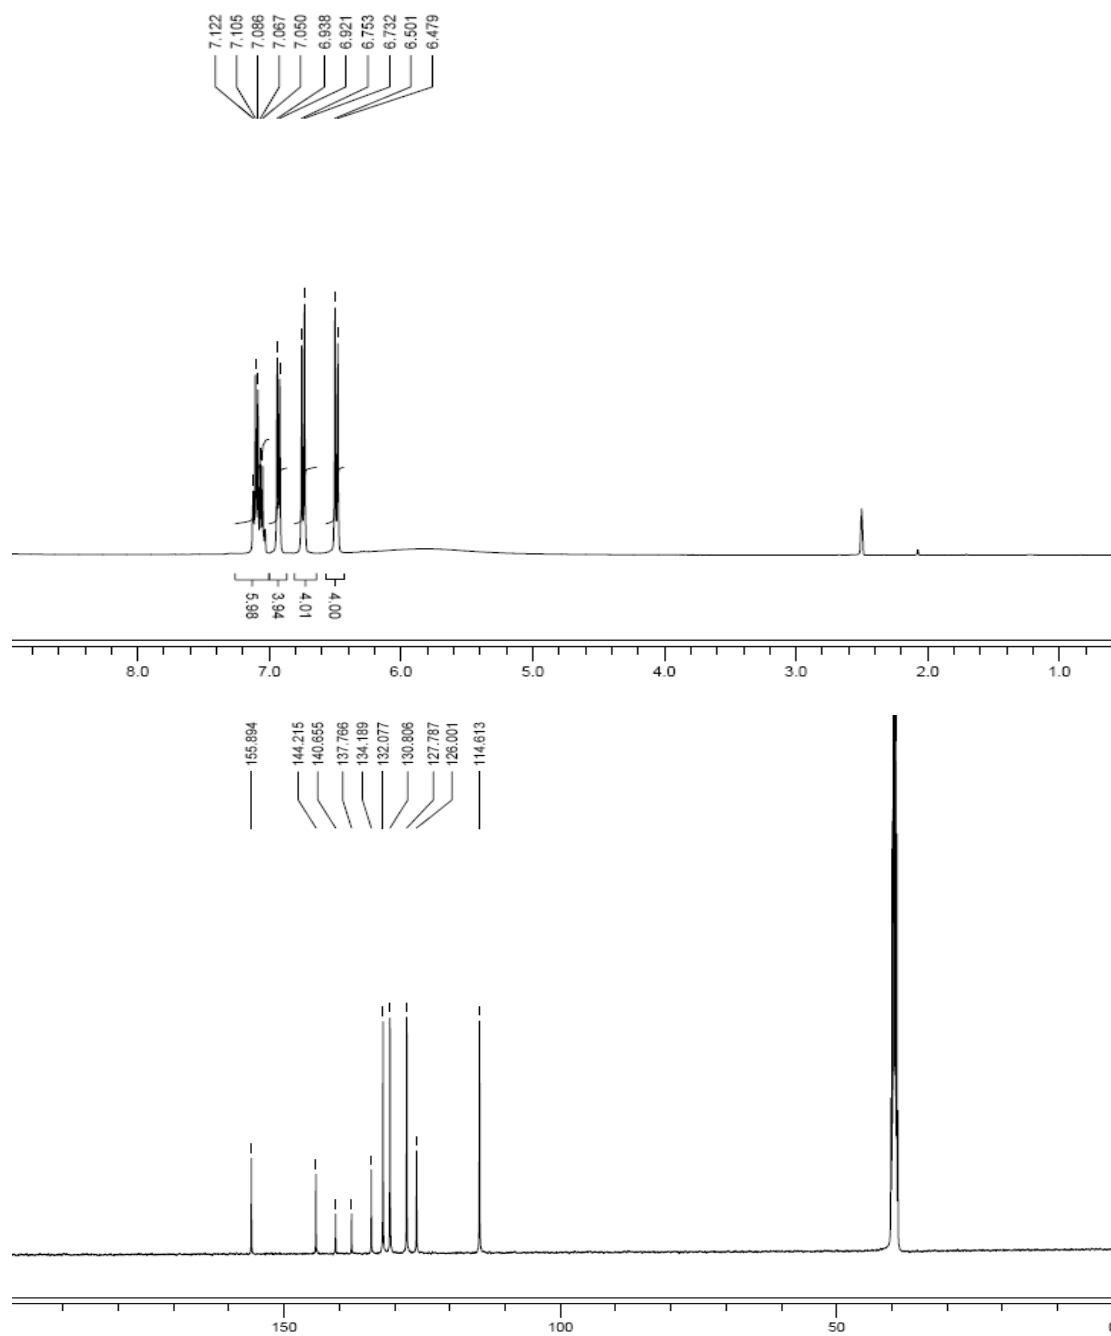

**Fig. S5**  $^1\text{H}$  and  $^{13}\text{C}$  NMR spectra of DHTPE.
